# Supplementary material for: A nitrogen-doped-carbon/ZnO modified Cu foam current collector for high-performance Li metal batteries
Source: Royal Society of Chemistry journal article supplement (doi:10.1039/c8ta12064a), 2019-01-01
Supplement: c8ta12064a1.pdf [file c8ta12064a1.pdf]

Supporting Information

**Nitrogen-Doped-Carbon/ZnO Modified Cu Foam Current Collector  
for High-Performance Li Metal Batteries**

Ying Zhou,<sup>a</sup> Kai Zhao,<sup>a</sup> Yu Han,<sup>a</sup> Zhenhe Sun,<sup>a</sup> Hongtao Zhang,<sup>a,b</sup> Lingqun Xu,<sup>a</sup>

Yanfeng Ma,<sup>a,b</sup> Yongsheng Chen<sup>a,b,\*</sup>

<sup>a</sup>The Centre of Nanoscale Science and Technology and Key Laboratory of Functional Polymer Materials, Nankai University, Tianjin, 300071, China.

<sup>b</sup>The National Institute for Advanced Materials, Nankai University, Tianjin 300071, China.

\*Corresponding author.

Tel: 86-22-2350-0693

*E-mail address:* yschen99@nankai.edu.cn.

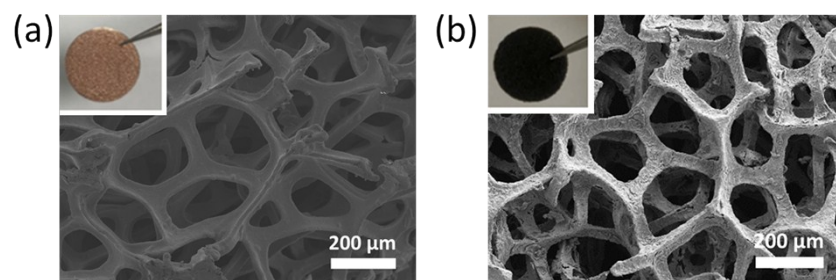

Fig. S1 The low-magnification SEM images of a) CuF and b) MCuF (insets are the corresponding optical photographs).

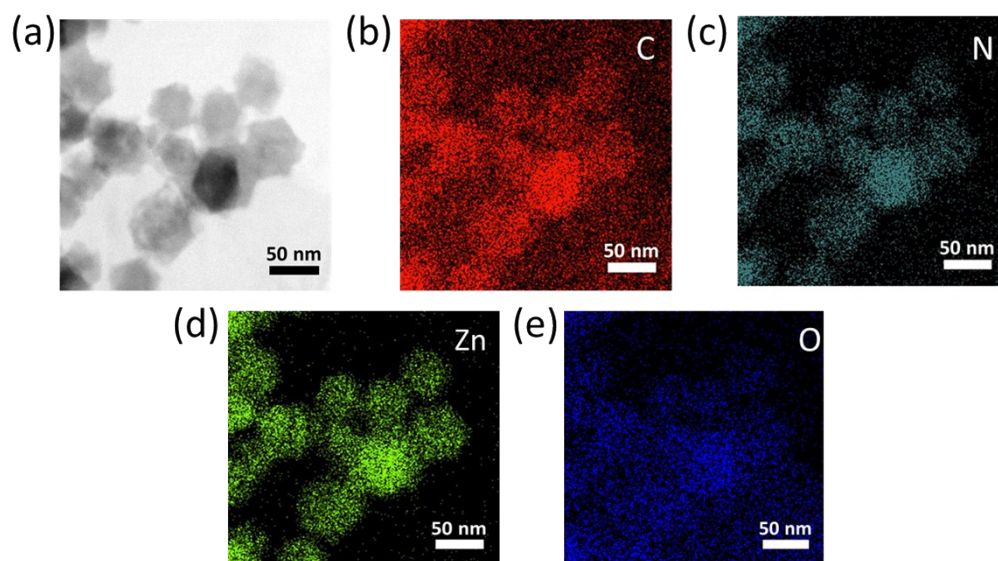

Fig. S2 a) The TEM image of ZIF-8-600 and the corresponding EDS mapping results of b) carbon, c) nitrogen, d) zinc and e) oxygen.

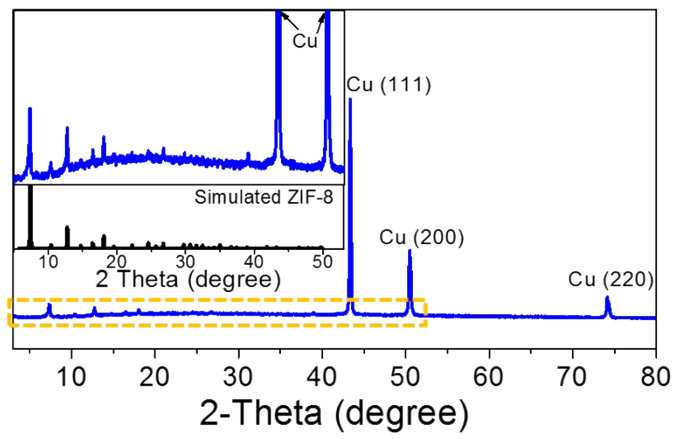

Fig. S3 The XRD pattern of CuF/ZIF-8 (inset is the magnification of the selected area).

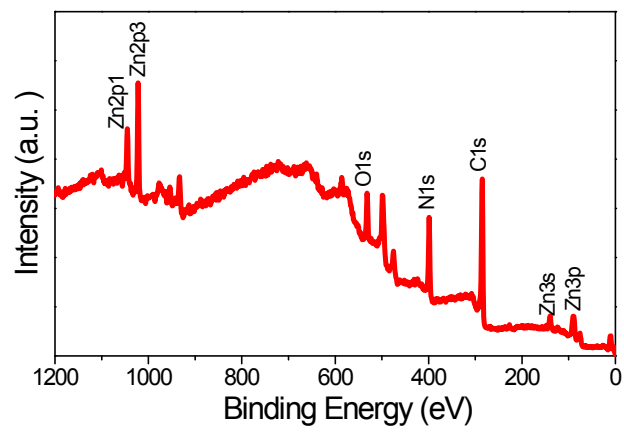

Fig. S4 The XPS survey spectrum of MCuF.

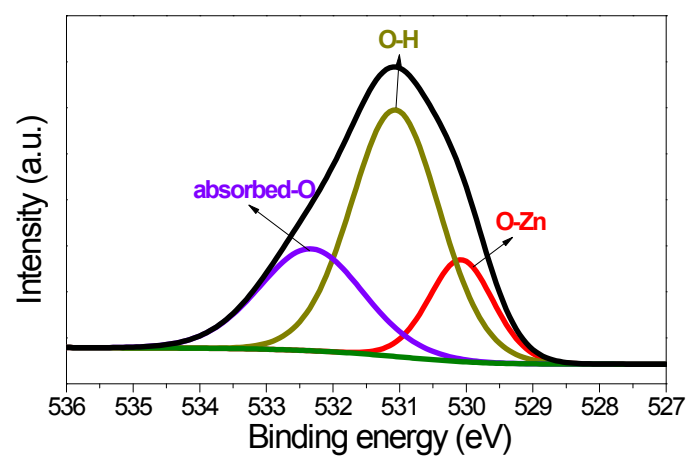

Fig. S5 O 1s spectrum of MCuF.

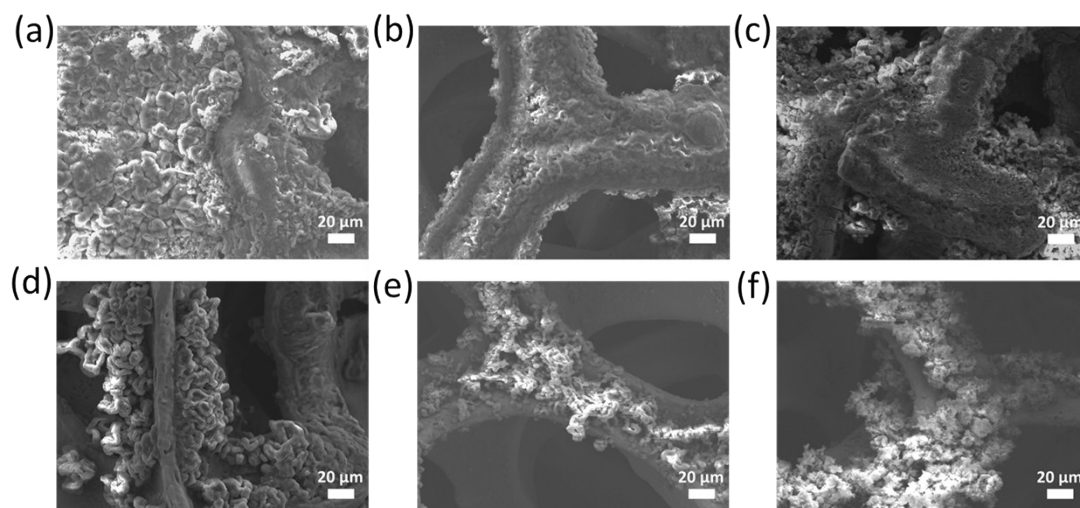

Fig. S6 Top view SEM images of MCuF after the a) 10th plating at  $1 \text{ mA cm}^{-2}$ . b) 10th plating at  $3 \text{ mA cm}^{-2}$ . c) 50th plating at  $3 \text{ mA cm}^{-2}$ . And top view SEM images of CuF after the d) 10th plating at  $1 \text{ mA cm}^{-2}$ . e) 10th plating at  $3 \text{ mA cm}^{-2}$ . f) 50th plating at  $3 \text{ mA cm}^{-2}$ . The area capacity is  $1 \text{ mA h cm}^{-2}$ .

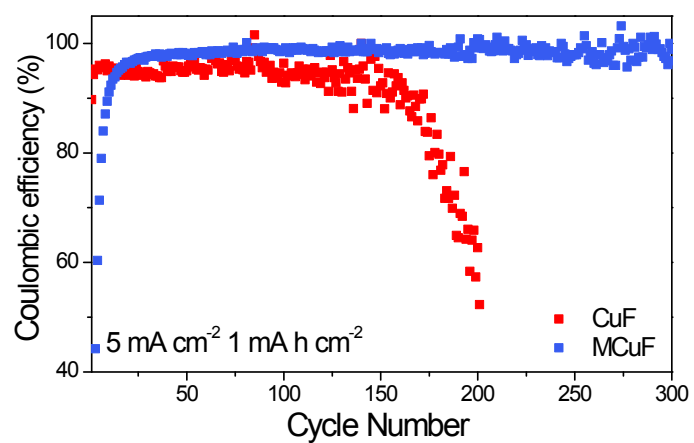

Fig. S7 Coulombic efficiencies of Li plating/stripping on MCuF and CuF with current density of 5 mA cm<sup>-2</sup> with an area capacity of 1 mA h cm<sup>-2</sup>.



Table S1. Comparison of the long-term cycling performances and Coulombic efficiencies of MCuF with previously reported Cu-based current collector for Li metal anodes.

| Reference<br>s       | Materials                                    | Current<br>density<br>(mA cm <sup>-2</sup> ) | Area<br>capacity<br>(mA h cm <sup>-2</sup> ) | Cycle number    | Coulombic<br>efficiency<br>(%) |
|----------------------|----------------------------------------------|----------------------------------------------|----------------------------------------------|-----------------|--------------------------------|
| 1                    | N-doped graphene coated<br>on 3D Cu          | 0.5                                          | 1                                            | 150             | 97.5                           |
|                      |                                              | 1                                            | 2                                            | 50              | 97                             |
|                      |                                              | 0.5                                          | 2                                            | 100             | 97.6                           |
|                      |                                              | 0.5                                          | 4                                            | 100             | 97.8                           |
| 2                    | Zn-Cu chemical dealloy                       | 0.5                                          | 1                                            | 250             | 97                             |
|                      |                                              | 1                                            | 1                                            | 140             | 97                             |
| 3                    | Zn-Cu electrochemical<br>dealloying          |                                              | 1                                            | 200             | 97.9                           |
|                      |                                              | 1                                            | 2                                            | 50              | 97.6                           |
|                      |                                              |                                              | 5                                            | 50              | 97.1                           |
| 4                    | Cu nanowire                                  | 1                                            | 2                                            | 200             | 98.6                           |
| 5                    | Hierarchically bicontinuous<br>porous copper | 1                                            |                                              | 270             | 98                             |
|                      |                                              | 1.5                                          | 1                                            | 200             | 96                             |
|                      |                                              | 2                                            |                                              | 150             | 95                             |
|                      |                                              | 3                                            |                                              | 100             | 94                             |
| 6                    | Vertically aligned 3D Cu                     | 1                                            | 3                                            | 200             | 98.5                           |
| 7                    | Vertically aligned CuO on<br>Cu collector    | 0.5                                          | 1                                            | After 180       | 94                             |
|                      |                                              | 1                                            | 1                                            | After 180       | 94                             |
| 8                    | 3D Cu skeleton fabricate by<br>NaCl template | 0.5                                          | 1                                            | 700             | 95                             |
|                      |                                              | 1                                            | 1                                            | 400             | 95                             |
| 9                    | Cu mesh                                      | 0.5                                          | 1                                            | first 70 cycles | 97                             |
|                      |                                              |                                              |                                              | after 100cycles | 93.8                           |
| <b>This<br/>work</b> | <b>MCuF</b>                                  | <b>1</b>                                     | <b>1</b>                                     | <b>600</b>      | 97.8                           |
|                      |                                              | 3                                            | 1                                            | 400             | 97.6                           |
|                      |                                              | 5                                            | 1                                            | 300             | 97.3                           |
|                      |                                              | <b>10</b>                                    | <b>1</b>                                     | <b>200</b>      | 96.5                           |
|                      |                                              | <b>3</b>                                     | <b>3</b>                                     | <b>120</b>      | 97.2                           |

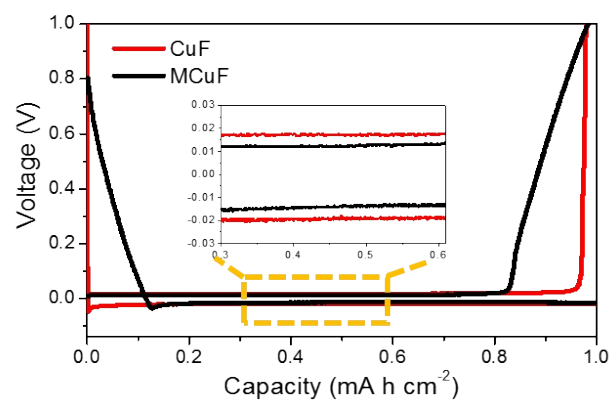

Fig. S8 Voltage profiles of Li plating/stripping on MCuF and CuF at the current density of 1 mA cm<sup>-2</sup> with an area capacity of 1 mA h cm<sup>-2</sup>.

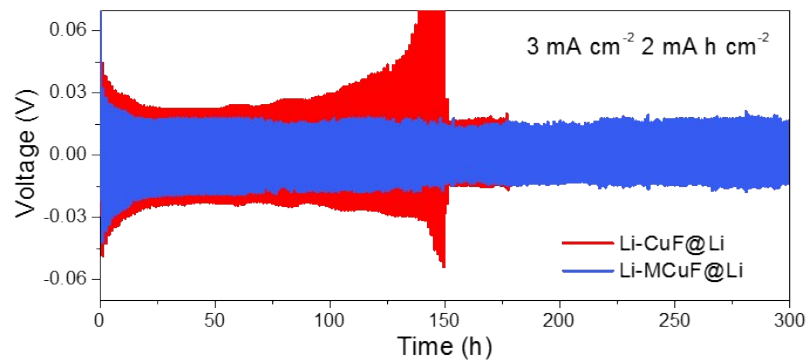

Fig. S9 Voltage-time profiles of MCuF@Li and CuF@Li symmetrical cells at the current density of 3 mA cm<sup>-2</sup> with an area capacity of 2 mA h cm<sup>-2</sup>.

## References:

- 1 R. Zhang, S. Wen, N. Wang, K. Qin, E. Liu, C. Shi and N. Zhao, *Adv. Energy Mater.*, 2018, 1800914.
- 2 Q. Yun, Y. B. He, W. Lv, Y. Zhao, B. Li, F. Kang and Q. H. Yang, *Adv. Mater.*, 2016, **28**, 6932-6939.
- 3 H. Zhao, D. Lei, Y.-B. He, Y. Yuan, Q. Yun, B. Ni, W. Lv, B. Li, Q.-H. Yang, F. Kang and J. Lu, *Adv. Energy Mater.*, 2018, **8**, 1800266.
- 4 L. L. Lu, J. Ge, J. N. Yang, S. M. Chen, H. B. Yao, F. Zhou and S. H. Yu, *Nano Lett.*, 2016, **16**, 4431-4437.
- 5 X. Ke, Y. Cheng, J. Liu, L. Liu, N. Wang, J. Liu, C. Zhi, Z. Shi and Z. Guo, *ACS Appl Mater Interfaces*, 2018, **10**, 13552-13561.
- 6 S. H. Wang, Y. X. Yin, T. T. Zuo, W. Dong, J. Y. Li, J. L. Shi, C. H. Zhang, N. W. Li, C. J. Li and Y. G. Guo, *Adv Mater.*, 2017, **29**, 1703729.
- 7 C. Zhang, W. Lv, G. Zhou, Z. Huang, Y. Zhang, R. Lyu, H. Wu, Q. Yun, F. Kang and Q.-H. Yang, *Adv. Energy Mater.*, 2018, **8**, 1703404.
- 8 Y. Wang, Z. Wang, D. Lei, W. Lv, Q. Zhao, B. Ni, Y. Liu, B. Li, F. Kang and Y. B. He, *ACS Appl Mater Interfaces*, 2018, **10**, 20244-20249.
- 9 Q. Li, S. Zhu and Y. Lu, *Adv. Funct. Mater.*, 2017, **27**, 1606422.
